# Supplementary material for: Evolutionary divergence in the conformational landscapes of tyrosine vs serine/threonine kinases
Source: eLife. 2022 Dec 23;11:e83368. doi: 10.7554/eLife.83368 (PMC9822262; doi:10.7554/eLife.83368)
Supplement: Figure 3—source data 1. [file elife-83368-fig3-data1.csv]

Kinase Class	Gene	Inhibitor	Inhibitor Type	dG Exp.	dG ABFE	Error dG ABFE	dG Reorg (ABFE-Exp)	Complex in PDB?	PDB	Ligand HET	Supplementary Figure	Exp. DOI
STK	BRAF	18	1	-11.79	-19.49	0.05	7.7	Yes	3D4Q	SM5	7	https://doi.org/10.1016/j.bmcl.2008.07.002
STK	BRAF	20	1	-7.6	-18.58	0.24	10.98	No	-	-	7	https://doi.org/10.1016/j.bmcl.2008.07.002
STK	BRAF	23	1	-8.95	-18.03	0.03	9.08	No	-	-	7	https://doi.org/10.1016/j.bmcl.2008.07.002
STK	BRAF	4	2	-11.79	-19.49	0.31	7.7	Yes	4G9C	0WP	8	https://doi.org/10.1016/j.bmcl.2012.08.007
STK	BRAF	BIRB-76	2	-7.6	-18.58	0.35	10.98	Yes	4JVG	B96	8	https://doi.org/10.1038/nchembio.1257
STK	BRAF	Ponatinib	2	-8.95	-18.03	0.23	9.08	Yes	6P3D	0LI	8	https://doi.org/10.1038/s41467-020-18123-2
STK	BRAF	6d	2	-10.82	-16.72	0.62	5.9	Yes	4DBN	0JA	8	https://doi.org/10.1021/jm300126x
STK	BRAF	8b	2	-11.03	-15.4	0.24	4.37	Yes	4KSP	1SU	8	https://doi.org/10.1021/jm400778d
STK	BRAF	RAF265	2	-9.77	-15.25	0.48	5.48	Yes	5CT7	55J	8	https://doi.org/10.1021%2Fml500526p
STK	BRAF	BAY89006	2	-10.46	-14.72	0.24	4.26	Yes	1UWH	BAX	8	https://doi.org/10.1016/s0092-8674(04)00215-6
STK	BRAF	5	2	-9.78	-13.6	0.35	3.82	Yes	4FC0	0T2	8	https://doi-org.libproxy.temple.edu/10.1016/j.bmc.2012.07.032
STK	CDK2	1H1S	1	-11.25	-7.51	0.36	-3.74	Yes	1H1S	4SP	9	https://doi.org/10.1038/nsb842
STK	CDK2	1OIY	1	-9.79	-7.79	0.19	-2	Yes	1OIY	N41	9	https://doi.org/10.1021/jm0311442
STK	CDK2	1OI9	1	-9.74	-8.33	0.15	-1.41	Yes	1OI9	N20	9	https://doi.org/10.1021/jm0311442
STK	CDK2	1OIU	1	-9.08	-8.84	0.14	-0.24	Yes	1OIU	N76	9	https://doi.org/10.1021/jm0311442
STK	CDK2	1H1Q	1	-8.18	-6.11	0.15	-2.07	Yes	1H1Q	2A6	9	https://doi.org/10.1038/nsb842
STK	CDK2	1H1R	1	-7.67	-5.77	0.18	-1.9	Yes	1H1R	6CP	9	https://doi.org/10.1038/nsb842
STK	CDK2	K03861	2	-9.97	-16.27	0.51	6.3	Yes	5A14	LQ5	10	https://doi.org/10.1021/acschembio.5b00398
STK	CDK2	Sorafenib	2	-6.91	-15.1	0.25	8.19	No	-	-	10	https://doi.org/10.1038/nbt.1990
STK	CDK2	K03859	2	-6.83	-15.03	0.27	8.2	No	-	-	10	https://doi.org/10.1021/acschembio.5b00398
STK	IRAK4	8a	1	-11.88	-16.51	0.31	4.63	Yes	6THX	N9Z	11	https://doi.org/10.1016/j.bmc.2020.115815
STK	IRAK4	16a	1	-11.64	-13.28	1.03	1.64	Yes	6TIA	ND2	11	https://doi.org/10.1016/j.bmc.2020.115815
STK	IRAK4	15a	1	-10.77	-13.32	1.99	2.55	Yes	6TI8	NBW	11	https://doi.org/10.1016/j.bmc.2020.115815
STK	IRAK4	1	1	-9.66	-11.8	0.94	2.14	Yes	5T1S	76Q	11	https://doi.org/10.1016/j.bmcl.2017.04.050
STK	IRAK4	14	1	-8.08	-10.04	0.51	1.96	No	-	-	11	https://doi.org/10.1016/j.bmcl.2017.04.050
STK	IRAK4	12	1	-7.01	-10.84	0.99	3.83	No	-	-	11	https://doi.org/10.1016/j.bmcl.2017.04.050
STK	IRAK4	Ponatinib	2	-9.8	-16.51	0.33	6.71	Yes	6EG9	0LI	-	https://doi.org/10.1074/jbc.ra118.005428
STK	IRAK4	HG-12-6	2	-9.26	-13.28	0.15	4.02	Yes	6EGA	J8A	-	https://doi.org/10.1074/jbc.ra118.005428
STK	MAPK9	35	1	-9.4	-10.06	0.41	0.66	Yes	3E7O	35F	-	https://doi.org/10.1021/acschembio.5b00398
STK	MAPK9	BIRB-76	2	-11.39	-19.88	0.54	8.49	Yes	3NPC	B96	12	https://doi.org/10.1016/j.bmcl.2010.06.157
STK	MAPK9	Sorafenib	2	-7.01	-15.26	0.66	8.25	No	-	-	12	https://doi.org/10.1016/j.jmb.2008.08.086
STK	MAPK9	EXEL-2880	2	-8.43	-13.84	0.48	5.41	No	-	-	12	https://doi.org/10.1021/cb500129t
STK	MAPK9	HG-7-92-01	2	-6.82	-11.96	0.33	5.14	No	-	-	12	https://doi.org/10.1021/jm500480k
STK	MELK	1	1	-5.18	-8.06	0.35	2.88	Yes	4UMR	QBB	13	https://doi.org/10.1021/ml5001245
STK	MELK	5	1	-6.15	-8.72	0.13	2.57	Yes	4D2W	NF5	13	https://doi.org/10.1021/ml5001245
STK	MELK	3	1	-7.34	-9.71	0.56	2.37	Yes	4UMQ	0V0	13	https://doi.org/10.1021/ml5001245
STK	MELK	9	1	-7.52	-8.31	0.32	0.79	Yes	4UMP	47W	13	https://doi.org/10.1021/ml5001245
STK	MELK	2	1	-7.75	-8.45	0.28	0.7	Yes	4D2P	6Z7	13	https://doi.org/10.1021/ml5001245
STK	MELK	6	1	-8.71	-9.29	0.51	0.58	No	-	-	13	https://doi.org/10.1021/ml5001245
STK	MELK	7	1	-10.14	-10.86	0.23	0.72	Yes	4D2V	45R	13	https://doi.org/10.1021/ml5001245
STK	MELK	6	2	-9.71	-17.14	0.38	7.43	No	-	-	14	https://doi.org/10.1021/ml5001273
STK	MELK	7	2	-10.53	-16.54	0.52	6.01	No	-	-	14	https://doi.org/10.1021/ml5001273
STK	MELK	4	2	-8.44	-13.98	0.22	5.54	Yes	4UMU	0V0	14	https://doi.org/10.1021/ml5001273
STK	MELK	5	2	-8.38	-13.47	0.48	5.09	Yes	4UMT	47W	14	https://doi.org/10.1021/ml5001273
STK	MELK	3	2	-7.22	-12.37	0.3	5.15	No	-	-	14	https://doi.org/10.1021/ml5001273
STK	MELK	2	2	-6.3	-10.49	0.27	4.19	No	-	-	14	https://doi.org/10.1021/ml5001273
TK	ABL1	406(8)	2	-10.87	-14.34	0.48	3.47	Yes	2E2B	406	15	https://doi.org/10.1016/j.bmcl.2007.03.002
TK	ABL1	44	2	-10.37	-13.83	0.31	3.46	Yes	3KFA	B91	15	https://doi.org/10.1111/j.1747-0285.2009.00905.x
TK	ABL1	4	2	-11.62	-12.28	1.19	0.66	No	-	-	15	https://doi.org/10.1016/j.bmcl.2007.03.002
TK	ABL1	Imatinib	2	-10.8	-10.83	0.55	0.03	Yes	6NPV	KWP	15	https://doi.org/10.1021/acs.jmedchem.8b01872
TK	ABL1	2	2	-10.18	-10.29	1.31	0.11	No	-	-	15	https://doi.org/10.1016/j.bmcl.2007.03.002
TK	ABL1	35	2	-9.83	-9.69	0.32	-0.14	No	-	-	15	https://doi.org/10.1111/j.1747-0285.2009.00905.x
TK	DDR1	Imatinib	2	-11.91	-11.73	1.22	-0.18	Yes	4BKJ	STI	16	https://doi.org/10.1016/j.jmb.2014.04.014
TK	DDR1	6h	2	-8.85	-11.25	1.56	2.4	No	-	-	16	https://doi.org/10.1021/acs.jmedchem.6b00140
TK	DDR1	6c	2	-8.89	-10.98	1.07	2.09	Yes	5FDP	5WR	16	https://doi.org/10.1021/acs.jmedchem.6b00140
TK	DDR1	7c	2	-11.27	-9.88	0.28	-1.39	Yes	6HP9	GKB	16	https://doi.org/10.1021/acs.jmedchem.9b00365
TK	DDR1	7m	2	-9.78	-8.25	0.22	-1.53	No	-	-	16	https://doi.org/10.1021/acs.jmedchem.9b00365
TK	LCK	16	2	-11.33	-13.9	0.36	2.57	No	-	-	17	https://doi.org/10.1021/jm7010996
TK	LCK	19	2	-12.42	-13.33	0.92	0.91	Yes	3BYU	AM6	17	https://doi.org/10.1021/jm7010996
TK	LCK	10b	2	-12.7	-11.95	0.78	-0.75	Yes	3BYS	AM5	17	https://doi.org/10.1021/jm7010996
TK	LCK	Imatinib	2	-8.87	-10.18	0.56	1.31	Yes	2PL0	STI	17	https://doi.org/10.1002/prot.21633
TK	NTRK2	GW2580	2	-10.16	-12.57	0.11	2.41	No	-	-	-	https://doi.org/10.1016/j.jmb.2012.08.002
TK	NTRK2	EX429	2	-10.82	-11.85	0.17	1.03	Yes	4AT4	T6E	-	https://doi.org/10.1016/j.jmb.2012.08.002
TK	TIE2	1b	2	-12.29	-11.83	0.44	-0.46	Yes	2OO8	RAJ	18	https://doi.org/10.1016/j.bmcl.2007.02.067
TK	TIE2	2	2	-10.61	-10.69	0.45	0.08	Yes	2OSC	MUH	18	https://doi.org/10.1021/jm061107l
TK	TIE2	15	2	-10.92	-10.69	0.34	-0.23	Yes	2P4I	MR9	18	https://doi.org/10.1021/jm061107l
TK	TIE2	42	2	-9.31	-10.24	0.05	0.93	No	-	-	18	https://doi.org/10.1021/jm061107l
TK	TIE2	46	2	-8.74	-7.12	0.14	-1.62	No	-	-	18	https://doi.org/10.1021/jm061107l
